# Supplementary material
Source: PubMed Central journal article supplement (PMC5837000)
Supplement: NIHMS75372-supplement-Supplementary_Dataset_1.pdf [file NIHMS75372-supplement-Supplementary_Dataset_1.pdf]

# Rajini

| Chain | Residue | Number | Solvated area | Degree | Betweenness centrality | Closeness centrality |
|-------|---------|--------|---------------|--------|------------------------|----------------------|
| A     | T       | 9      | 105.26        | 4      | 0                      | 13.219               |
| A     | E       | 10     | 118.16        | 4      | 0                      | 13.219               |
| A     | D       | 11     | 119.18        | 6      | 0.005                  | 12.4                 |
| A     | Q       | 12     | 104.75        | 7      | 0.011                  | 12.354               |
| A     | R       | 13     | 147.57        | 8      | 0.027                  | 12.222               |
| A     | N       | 14     | 92.36         | 7      | 0.002                  | 11.892               |
| A     | E       | 15     | 109.34        | 8      | 0.052                  | 11.406               |
| A     | E       | 16     | 95.59         | 8      | 0.033                  | 11.362               |
| A     | K       | 17     | 143.37        | 8      | 0.032                  | 11.231               |
| A     | A       | 18     | 38.23         | 8      | 0.018                  | 10.902               |
| A     | Q       | 19     | 62.25         | 12     | 0.176                  | 10.418               |
| A     | R       | 20     | 175           | 8      | 0.015                  | 10.788               |
| A     | E       | 21     | 80.1          | 8      | 0.034                  | 10.618               |
| A     | A       | 22     | 37.87         | 8      | 0.035                  | 10.203               |
| A     | N       | 23     | 29.73         | 10     | 0.064                  | 9.949                |
| A     | K       | 24     | 16.89         | 8      | 0.02                   | 10.176               |
| A     | K       | 25     | 127.9         | 9      | 0.249                  | 9.992                |
| A     | I       | 26     | 25.6          | 12     | 0.158                  | 9.308                |
| A     | E       | 27     | 68.48         | 9      | 0.054                  | 9.426                |
| A     | K       | 28     | 123.49        | 8      | 0.057                  | 9.536                |
| A     | Q       | 29     | 103.33        | 9      | 0.353                  | 9.354                |
| A     | L       | 30     | 31.02         | 11     | 0.224                  | 8.772                |
| A     | Q       | 31     | 109.69        | 8      | 0.098                  | 9.165                |
| A     | K       | 32     | 110.44        | 8      | 0.12                   | 9.106                |
| A     | D       | 33     | 37.25         | 10     | 0.221                  | 8.722                |
| A     | K       | 34     | 94.51         | 9      | 0.272                  | 8.578                |
| A     | Q       | 35     | 27.23         | 8      | 0.157                  | 8.649                |
| A     | V       | 36     | 61.67         | 8      | 0.109                  | 8.575                |
| A     | Y       | 37     | 51.95         | 10     | 0.249                  | 8.179                |
| A     | R       | 38     | 173.44        | 7      | 0.479                  | 8.352                |
| A     | A       | 39     | 26.94         | 7      | 0.167                  | 8.341                |
| A     | T       | 40     | 27.15         | 8      | 0.072                  | 8.369                |
| A     | H       | 41     | 41.22         | 9      | 0.48                   | 8.024                |
| A     | R       | 42     | 50.15         | 10     | 0.366                  | 7.944                |
| A     | L       | 43     | 18.88         | 14     | 0.361                  | 8                    |
| A     | L       | 44     | 12.44         | 10     | 0.06                   | 8.322                |
| A     | L       | 45     | 21.76         | 11     | 0.153                  | 8.385                |
| A     | L       | 46     | 23.52         | 10     | 0.092                  | 8.71                 |
| A     | G       | 47     | 28.59         | 5      | 0.033                  | 9.58                 |
| A     | A       | 48     | 99.91         | 2      | 0                      | 10.492               |
| A     | G       | 49     | 58.46         | 4      | 0.003                  | 10.347               |
| A     | E       | 50     | 155           | 5      | 0.035                  | 9.941                |
| A     | S       | 51     | 34.41         | 7      | 0.03                   | 9.621                |
| A     | G       | 52     | 40.14         | 6      | 0.02                   | 9.744                |
| A     | K       | 53     | 57.77         | 11     | 0.094                  | 8.966                |
| A     | S       | 54     | 75.2          | 6      | 0.004                  | 9.728                |
| A     | T       | 55     | 69.35         | 7      | 0.006                  | 9.728                |

| Chain | Residue | Number | Solvated area | Degree | Betweenness centrality | Closeness centrality |
|-------|---------|--------|---------------|--------|------------------------|----------------------|
| A     | I       | 56     | 71.11         | 5      | 0.002                  | 9.944                |
| A     | V       | 57     | 48.61         | 10     | 0.096                  | 9.143                |
| A     | K       | 58     | 51.64         | 5      | 0                      | 10.077               |
| A     | Q       | 59     | 102.9         | 3      | 0                      | 10.079               |
| A     | K       | 88     | 161.15        | 6      | 0.007                  | 10.778               |
| A     | A       | 89     | 98.25         | 4      | 0                      | 10.832               |
| A     | T       | 90     | 85.25         | 6      | 0                      | 10.76                |
| A     | K       | 91     | 106.29        | 9      | 0.741                  | 9.879                |
| A     | V       | 92     | 27.54         | 10     | 0.106                  | 10.684               |
| A     | Q       | 93     | 115.88        | 7      | 0.063                  | 10.656               |
| A     | D       | 94     | 13.53         | 8      | 0.087                  | 10.548               |
| A     | I       | 95     | 14.89         | 11     | 0.302                  | 10.414               |
| A     | K       | 96     | 29.16         | 11     | 0.166                  | 11.044               |
| A     | N       | 97     | 46.35         | 9      | 0.06                   | 10.989               |
| A     | N       | 98     | 35.84         | 11     | 0.097                  | 10.554               |
| A     | L       | 99     | 16.96         | 11     | 0.077                  | 10.932               |
| A     | K       | 100    | 18.1          | 14     | 0.162                  | 11.332               |
| A     | E       | 101    | 61.35         | 8      | 0.022                  | 10.951               |
| A     | A       | 102    | 10.29         | 12     | 0.066                  | 10.883               |
| A     | I       | 103    | 16.27         | 12     | 0.118                  | 10.963               |
| A     | E       | 104    | 31.59         | 10     | 0.045                  | 11.343               |
| A     | T       | 105    | 33.85         | 10     | 0.304                  | 10.498               |
| A     | I       | 106    | 16.37         | 14     | 0.058                  | 11.234               |
| A     | V       | 107    | 20.43         | 10     | 0.1                    | 11.341               |
| A     | A       | 108    | 31.65         | 8      | 0.059                  | 11.269               |
| A     | A       | 109    | 19.73         | 9      | 0.028                  | 11.181               |
| A     | M       | 110    | 23.89         | 12     | 0.089                  | 11.448               |
| A     | S       | 111    | 71            | 5      | 0.004                  | 11.58                |
| A     | N       | 112    | 93.68         | 7      | 0.209                  | 10.803               |
| A     | L       | 113    | 23.68         | 10     | 0.035                  | 11.238               |
| A     | V       | 114    | 130.58        | 4      | 0.007                  | 11.634               |
| A     | P       | 115    | 75.71         | 5      | 0.001                  | 12.011               |
| A     | P       | 116    | 66.77         | 7      | 0.007                  | 12.158               |
| A     | V       | 117    | 33.32         | 8      | 0.024                  | 11.967               |
| A     | E       | 118    | 58.48         | 5      | 0.001                  | 12.926               |
| A     | L       | 119    | 47.81         | 9      | 0.05                   | 12.254               |
| A     | A       | 120    | 49.76         | 7      | 0.009                  | 13.019               |
| A     | N       | 121    | 60.16         | 6      | 0.008                  | 13.158               |
| A     | P       | 122    | 100.88        | 5      | 0                      | 13.97                |
| A     | E       | 123    | 115.95        | 5      | 0                      | 13.973               |
| A     | N       | 124    | 26.63         | 10     | 0.02                   | 12.99                |
| A     | Q       | 125    | 104.91        | 7      | 0.005                  | 13.262               |
| A     | F       | 126    | 73.41         | 7      | 0.005                  | 13.234               |
| A     | R       | 127    | 74.42         | 10     | 0.006                  | 12.819               |
| A     | V       | 128    | 23.89         | 11     | 0.053                  | 12.285               |
| A     | D       | 129    | 49.58         | 8      | 0.002                  | 12.726               |
| A     | Y       | 130    | 31.55         | 11     | 0.014                  | 12.656               |
| A     | I       | 131    | 13.55         | 13     | 0.039                  | 11.869               |
| A     | L       | 132    | 57.14         | 8      | 0.025                  | 12.152               |

| Chain | Residue | Number | Solvated area | Degree | Betweenness centrality | Closeness centrality |
|-------|---------|--------|---------------|--------|------------------------|----------------------|
| A     | S       | 133    | 43.57         | 6      | 0                      | 12.681               |
| A     | V       | 134    | 17.7          | 9      | 0.018                  | 12.168               |
| A     | M       | 135    | 61.71         | 8      | 0.025                  | 11.869               |
| A     | N       | 136    | 75.04         | 3      | 0                      | 12.86                |
| A     | V       | 137    | 49.88         | 7      | 0.022                  | 12.309               |
| A     | P       | 138    | 132.35        | 3      | 0                      | 13.286               |
| A     | D       | 139    | 99.29         | 4      | 0                      | 13.285               |
| A     | F       | 140    | 32.23         | 9      | 0.034                  | 12.29                |
| A     | D       | 141    | 95.76         | 4      | 0.002                  | 12.844               |
| A     | F       | 142    | 17.85         | 9      | 0.048                  | 11.865               |
| A     | P       | 143    | 36.83         | 7      | 0.001                  | 12.42                |
| A     | P       | 144    | 109.85        | 6      | 0                      | 12.419               |
| A     | E       | 145    | 99.95         | 6      | 0                      | 12.416               |
| A     | F       | 146    | 13.85         | 12     | 0.049                  | 11.863               |
| A     | Y       | 147    | 31.47         | 12     | 0.087                  | 11.862               |
| A     | E       | 148    | 110.56        | 8      | 0.003                  | 12.382               |
| A     | H       | 149    | 34.6          | 10     | 0.018                  | 12.348               |
| A     | A       | 150    | 12.07         | 9      | 0.016                  | 11.888               |
| A     | K       | 151    | 73.6          | 10     | 0.025                  | 12.088               |
| A     | A       | 152    | 19.21         | 10     | 0.012                  | 12.565               |
| A     | L       | 153    | 19.14         | 12     | 0.015                  | 12.243               |
| A     | W       | 154    | 32.74         | 12     | 0.08                   | 11.626               |
| A     | E       | 155    | 91.88         | 6      | 0.001                  | 12.579               |
| A     | D       | 156    | 13.5          | 12     | 0.024                  | 12.359               |
| A     | E       | 157    | 104.29        | 7      | 0.003                  | 12.753               |
| A     | G       | 158    | 13.58         | 10     | 0.018                  | 12.193               |
| A     | V       | 159    | 17.37         | 10     | 0.02                   | 11.962               |
| A     | R       | 160    | 104.72        | 9      | 0.024                  | 11.873               |
| A     | A       | 161    | 36.62         | 8      | 0.011                  | 11.889               |
| A     | C       | 162    | 11.03         | 12     | 0.056                  | 11.241               |
| A     | Y       | 163    | 45.87         | 12     | 0.096                  | 11.115               |
| A     | E       | 164    | 78.7          | 7      | 0.036                  | 11.517               |
| A     | R       | 165    | 61.27         | 11     | 0.061                  | 11.095               |
| A     | S       | 166    | 16.95         | 8      | 0.018                  | 10.996               |
| A     | N       | 167    | 91.44         | 6      | 0.131                  | 10.762               |
| A     | E       | 168    | 32.75         | 8      | 0.019                  | 11.042               |
| A     | Y       | 169    | 31.07         | 11     | 0.235                  | 10.366               |
| A     | Q       | 170    | 115.58        | 5      | 0.535                  | 9.691                |
| A     | L       | 171    | 37.53         | 10     | 0.174                  | 10.377               |
| A     | I       | 172    | 43.58         | 6      | 0.044                  | 10.514               |
| A     | D       | 173    | 112.59        | 5      | 0.332                  | 9.685                |
| A     | C       | 174    | 33.34         | 5      | 0.044                  | 10.589               |
| A     | A       | 175    | 20.83         | 9      | 0.115                  | 10.495               |
| A     | Q       | 176    | 69.51         | 7      | 0.029                  | 10.968               |
| A     | Y       | 177    | 56.13         | 9      | 0.029                  | 11.031               |
| A     | F       | 178    | 17.8          | 13     | 0.148                  | 10.545               |
| A     | L       | 179    | 13.79         | 11     | 0.048                  | 10.978               |
| A     | D       | 180    | 66.96         | 7      | 0.013                  | 11.408               |
| A     | K       | 181    | 51.23         | 9      | 0.013                  | 11.469               |

| Chain | Residue | Number | Solvated area | Degree | Betweenness centrality | Closeness centrality |
|-------|---------|--------|---------------|--------|------------------------|----------------------|
| A     | I       | 182    | 16.03         | 11     | 0.04                   | 11.449               |
| A     | D       | 183    | 71.5          | 7      | 0.006                  | 11.93                |
| A     | V       | 184    | 43.95         | 7      | 0.001                  | 12.004               |
| A     | I       | 185    | 15.58         | 10     | 0.057                  | 11.23                |
| A     | K       | 186    | 79.52         | 7      | 0.006                  | 11.999               |
| A     | Q       | 187    | 114.04        | 7      | 0.002                  | 12.187               |
| A     | D       | 188    | 101.01        | 4      | 0                      | 12.422               |
| A     | D       | 189    | 86.32         | 4      | 0                      | 12.463               |
| A     | Y       | 190    | 35.1          | 9      | 0.053                  | 11.491               |
| A     | V       | 191    | 50.33         | 4      | 0                      | 12.374               |
| A     | P       | 192    | 31.16         | 8      | 0.012                  | 11.397               |
| A     | S       | 193    | 53.8          | 6      | 0.006                  | 11.426               |
| A     | D       | 194    | 54.09         | 6      | 0                      | 11.427               |
| A     | Q       | 195    | 36.06         | 6      | 0.005                  | 11.128               |
| A     | D       | 196    | 19.89         | 11     | 0.035                  | 11.099               |
| A     | L       | 197    | 36.32         | 11     | 0.105                  | 10.524               |
| A     | L       | 198    | 89.94         | 7      | 0.006                  | 10.961               |
| A     | R       | 199    | 116.94        | 7      | 0.018                  | 10.662               |
| A     | C       | 200    | 48.35         | 8      | 0.109                  | 10.29                |
| A     | R       | 201    | 52.26         | 5      | 0.026                  | 10.383               |
| A     | V       | 202    | 72.29         | 4      | 0.165                  | 9.493                |
| A     | S       | 205    | 61.92         | 5      | 0.029                  | 9.33                 |
| A     | G       | 206    | 33.09         | 4      | 0.001                  | 9.335                |
| A     | I       | 207    | 124.77        | 4      | 0.001                  | 9.335                |
| A     | F       | 208    | 50.95         | 6      | 0.043                  | 8.99                 |
| A     | E       | 209    | 23.27         | 11     | 0.169                  | 8.56                 |
| A     | T       | 210    | 41.24         | 7      | 0.063                  | 8.775                |
| A     | K       | 211    | 74.74         | 6      | 0.164                  | 8.742                |
| A     | F       | 212    | 45.7          | 5      | 0.035                  | 9.069                |
| A     | Q       | 213    | 72.53         | 6      | 0.759                  | 9.064                |
| A     | V       | 214    | 24.65         | 7      | 0.105                  | 9.037                |
| A     | D       | 215    | 73.77         | 5      | 0.002                  | 9.195                |
| A     | K       | 216    | 61.51         | 4      | 0.001                  | 9.358                |
| A     | V       | 217    | 15.84         | 8      | 0.628                  | 8.461                |
| A     | N       | 218    | 64.94         | 5      | 0.052                  | 8.735                |
| A     | F       | 219    | 15.6          | 10     | 0.184                  | 8.285                |
| A     | H       | 220    | 27.88         | 11     | 0.403                  | 8.041                |
| A     | M       | 221    | 29.97         | 7      | 0.089                  | 8.473                |
| A     | F       | 222    | 15.39         | 9      | 0.15                   | 8.232                |
| A     | D       | 223    | 27.83         | 7      | 0.025                  | 8.879                |
| A     | V       | 224    | 17.94         | 10     | 0.12                   | 8.53                 |
| A     | G       | 225    | 43.46         | 5      | 0.042                  | 9.173                |
| A     | G       | 226    | 27.27         | 6      | 0.074                  | 9.02                 |
| A     | Q       | 227    | 32.44         | 9      | 0.079                  | 8.785                |
| A     | R       | 228    | 67.36         | 9      | 0.106                  | 8.937                |
| A     | D       | 229    | 61.88         | 5      | 0.018                  | 9.372                |
| A     | E       | 230    | 32.65         | 9      | 0.169                  | 8.818                |
| A     | R       | 231    | 62.42         | 7      | 0.218                  | 8.682                |
| A     | R       | 232    | 39.59         | 11     | 0.456                  | 8.385                |

| Chain | Residue | Number | Solvated area | Degree | Betweenness centrality | Closeness centrality |
|-------|---------|--------|---------------|--------|------------------------|----------------------|
| A     | K       | 233    | 36.48         | 12     | 0.352                  | 8.355                |
| A     | W       | 234    | 24.26         | 13     | 0.336                  | 8.272                |
| A     | I       | 235    | 18.98         | 10     | 0.413                  | 8.197                |
| A     | Q       | 236    | 46.26         | 10     | 0.521                  | 8.08                 |
| A     | C       | 237    | 11.16         | 11     | 0.364                  | 8.224                |
| A     | F       | 238    | 18.29         | 13     | 0.161                  | 8.281                |
| A     | N       | 239    | 49.22         | 9      | 0.177                  | 8.102                |
| A     | D       | 240    | 44.85         | 5      | 0.015                  | 8.293                |
| A     | V       | 241    | 13.92         | 10     | 0.087                  | 8.165                |
| A     | T       | 242    | 39.44         | 7      | 0.057                  | 8.175                |
| A     | A       | 243    | 14.55         | 11     | 0.151                  | 8.064                |
| A     | I       | 244    | 20.33         | 12     | 0.093                  | 8.31                 |
| A     | I       | 245    | 22.63         | 10     | 0.081                  | 8.435                |
| A     | F       | 246    | 17.66         | 12     | 0.385                  | 8.376                |
| A     | V       | 247    | 21.9          | 9      | 0.103                  | 8.946                |
| A     | V       | 248    | 17.87         | 10     | 0.074                  | 9.019                |
| A     | A       | 249    | 22.44         | 7      | 0.014                  | 9.837                |
| A     | S       | 250    | 16.55         | 10     | 0.079                  | 9.678                |
| A     | S       | 251    | 17.89         | 8      | 0.015                  | 10.221               |
| A     | S       | 252    | 17.94         | 9      | 0.011                  | 10.181               |
| A     | Y       | 253    | 21.26         | 13     | 0.085                  | 10.204               |
| A     | N       | 254    | 32.62         | 8      | 0.041                  | 10.505               |
| A     | M       | 255    | 152.5         | 5      | 0.001                  | 10.494               |
| A     | T       | 263    | 47.28         | 6      | 0.093                  | 10.275               |
| A     | N       | 264    | 22.67         | 11     | 0.054                  | 10.068               |
| A     | R       | 265    | 108.72        | 9      | 0.1                    | 9.662                |
| A     | L       | 266    | 15.92         | 11     | 0.091                  | 9.596                |
| A     | Q       | 267    | 27.68         | 9      | 0.065                  | 9.488                |
| A     | E       | 268    | 35.32         | 10     | 0.224                  | 9.258                |
| A     | A       | 269    | 12.84         | 10     | 0.212                  | 8.875                |
| A     | L       | 270    | 14.65         | 11     | 0.193                  | 9.281                |
| A     | N       | 271    | 30.64         | 9      | 0.149                  | 9.2                  |
| A     | L       | 272    | 27.5          | 11     | 0.418                  | 8.555                |
| A     | F       | 273    | 12.74         | 14     | 0.223                  | 8.694                |
| A     | K       | 274    | 88.96         | 11     | 0.604                  | 8.731                |
| A     | S       | 275    | 12.49         | 11     | 0.163                  | 8.627                |
| A     | I       | 276    | 24.9          | 11     | 0.226                  | 8.42                 |
| A     | W       | 277    | 22.74         | 14     | 0.777                  | 8.329                |
| A     | N       | 278    | 47.77         | 9      | 0.053                  | 8.76                 |
| A     | N       | 279    | 27.54         | 9      | 0.119                  | 8.587                |
| A     | R       | 280    | 76.75         | 5      | 0.004                  | 8.782                |
| A     | W       | 281    | 40.21         | 8      | 0.279                  | 8.269                |
| A     | L       | 282    | 22.11         | 10     | 0.152                  | 8.147                |
| A     | R       | 283    | 113.22        | 8      | 0.075                  | 8.429                |
| A     | T       | 284    | 79.08         | 6      | 0.085                  | 8.353                |
| A     | I       | 285    | 18.55         | 10     | 0.138                  | 8.282                |
| A     | S       | 286    | 16.15         | 9      | 0.036                  | 8.29                 |
| A     | V       | 287    | 13.63         | 11     | 0.094                  | 8.462                |
| A     | I       | 288    | 13.93         | 13     | 0.344                  | 8.144                |

| Chain | Residue | Number | Solvated area | Degree | Betweenness centrality | Closeness centrality |
|-------|---------|--------|---------------|--------|------------------------|----------------------|
| A     | L       | 289    | 11.59         | 11     | 0.088                  | 8.671                |
| A     | F       | 290    | 25.08         | 12     | 0.118                  | 8.698                |
| A     | L       | 291    | 12.09         | 12     | 0.103                  | 9.167                |
| A     | N       | 292    | 32.4          | 11     | 0.08                   | 9.355                |
| A     | K       | 293    | 47.58         | 10     | 0.056                  | 9.801                |
| A     | Q       | 294    | 19.2          | 12     | 0.103                  | 9.784                |
| A     | D       | 295    | 56.44         | 8      | 0.008                  | 10.643               |
| A     | L       | 296    | 56.01         | 8      | 0.01                   | 10.549               |
| A     | L       | 297    | 18.16         | 13     | 0.05                   | 10.306               |
| A     | A       | 298    | 22.91         | 9      | 0.026                  | 10.543               |
| A     | E       | 299    | 76.34         | 8      | 0.006                  | 11.177               |
| A     | K       | 300    | 13.94         | 10     | 0.041                  | 10.902               |
| A     | V       | 301    | 27.04         | 10     | 0.011                  | 11.142               |
| A     | L       | 302    | 68.66         | 9      | 0.007                  | 11.234               |
| A     | A       | 303    | 58.33         | 6      | 0.001                  | 11.854               |
| A     | G       | 304    | 40.11         | 7      | 0.002                  | 11.798               |
| A     | K       | 305    | 204.32        | 4      | 0                      | 11.973               |
| A     | S       | 306    | 57.56         | 6      | 0.012                  | 11.052               |
| A     | K       | 307    | 93.31         | 8      | 0.019                  | 10.999               |
| A     | I       | 308    | 14.28         | 10     | 0.03                   | 10.489               |
| A     | E       | 309    | 77.26         | 7      | 0.004                  | 10.964               |
| A     | D       | 310    | 56.54         | 6      | 0.04                   | 10.848               |
| A     | Y       | 311    | 58.08         | 9      | 0.013                  | 10.681               |
| A     | F       | 312    | 17.73         | 12     | 0.156                  | 10.045               |
| A     | P       | 313    | 39.71         | 7      | 0.013                  | 10.939               |
| A     | E       | 314    | 42.06         | 7      | 0.014                  | 10.562               |
| A     | F       | 315    | 12.1          | 10     | 0.03                   | 10.545               |
| A     | A       | 316    | 53.18         | 6      | 0.002                  | 11.176               |
| A     | R       | 317    | 194.88        | 5      | 0.002                  | 11.238               |
| A     | Y       | 318    | 23.2          | 10     | 0.041                  | 10.563               |
| A     | T       | 319    | 103.19        | 4      | 0.003                  | 11.209               |
| A     | T       | 320    | 40.37         | 6      | 0.004                  | 11.208               |
| A     | P       | 321    | 34.91         | 7      | 0.043                  | 10.712               |
| A     | E       | 322    | 86.65         | 4      | 0.003                  | 11.101               |
| A     | D       | 323    | 99.62         | 5      | 0.107                  | 10.283               |
| A     | A       | 324    | 26.63         | 6      | 0.007                  | 11.097               |
| A     | T       | 325    | 107.79        | 5      | 0.031                  | 10.725               |
| A     | P       | 326    | 79.83         | 4      | 0.001                  | 11.448               |
| A     | E       | 327    | 146.92        | 5      | 0.009                  | 11.495               |
| A     | P       | 328    | 152.12        | 3      | 0                      | 11.775               |
| A     | G       | 329    | 92.03         | 3      | 0                      | 11.775               |
| A     | E       | 330    | 46.3          | 8      | 0.053                  | 10.825               |
| A     | D       | 331    | 40.16         | 6      | 0                      | 11.645               |
| A     | P       | 332    | 86.07         | 6      | 0                      | 11.514               |
| A     | R       | 333    | 103.15        | 8      | 0.001                  | 11.338               |
| A     | V       | 334    | 21.52         | 11     | 0.02                   | 10.772               |
| A     | T       | 335    | 15.48         | 11     | 0.031                  | 10.771               |
| A     | R       | 336    | 45.26         | 11     | 0.033                  | 10.535               |
| A     | A       | 337    | 12.5          | 11     | 0.038                  | 10.374               |

| Chain | Residue | Number | Solvated area | Degree | Betweenness centrality | Closeness centrality |
|-------|---------|--------|---------------|--------|------------------------|----------------------|
| A     | K       | 338    | 24.46         | 12     | 0.207                  | 9.849                |
| A     | Y       | 339    | 34.21         | 11     | 0.053                  | 10.337               |
| A     | F       | 340    | 8.17          | 13     | 0.089                  | 10.045               |
| A     | I       | 341    | 20.4          | 12     | 0.086                  | 9.64                 |
| A     | R       | 342    | 49.27         | 11     | 0.099                  | 9.508                |
| A     | D       | 343    | 28.81         | 10     | 0.047                  | 9.756                |
| A     | E       | 344    | 20.96         | 8      | 0.03                   | 9.492                |
| A     | F       | 345    | 17.57         | 14     | 0.163                  | 9.075                |
| A     | L       | 346    | 22.33         | 11     | 0.06                   | 9.279                |
| A     | R       | 347    | 118.89        | 9      | 0.012                  | 9.596                |
| A     | I       | 348    | 24.72         | 10     | 0.083                  | 8.829                |
| A     | S       | 349    | 16.46         | 9      | 0.03                   | 9.102                |
| A     | T       | 350    | 38.69         | 8      | 0.012                  | 9.414                |
| A     | A       | 351    | 60.98         | 6      | 0.004                  | 9.444                |
| A     | S       | 352    | 62.15         | 6      | 0.08                   | 8.704                |
| A     | G       | 353    | 68.81         | 5      | 0.015                  | 9.269                |
| A     | D       | 354    | 58.37         | 6      | 0.129                  | 8.588                |
| A     | G       | 355    | 25.23         | 6      | 0.088                  | 8.578                |
| A     | R       | 356    | 131.6         | 5      | 0.124                  | 8.515                |
| A     | H       | 357    | 19.7          | 9      | 0.173                  | 8.342                |
| A     | Y       | 358    | 54.01         | 9      | 0.616                  | 8.383                |
| A     | C       | 359    | 18.06         | 8      | 0.051                  | 8.711                |
| A     | Y       | 360    | 25.8          | 11     | 0.175                  | 8.495                |
| A     | P       | 361    | 43.86         | 6      | 0.054                  | 9.063                |
| A     | H       | 362    | 35.85         | 8      | 0.089                  | 8.895                |
| A     | F       | 363    | 36.28         | 7      | 0.224                  | 9.36                 |
| A     | T       | 364    | 30.12         | 10     | 0.129                  | 9.206                |
| A     | C       | 365    | 35.94         | 6      | 0.014                  | 9.954                |
| A     | A       | 366    | 46.19         | 5      | 0.006                  | 10.14                |
| A     | V       | 367    | 113.36        | 4      | 0.002                  | 10.765               |
| A     | D       | 368    | 142.71        | 4      | 0.013                  | 10.02                |
| A     | T       | 369    | 63.27         | 3      | 0.002                  | 10.502               |
| A     | E       | 370    | 118.07        | 5      | 0.024                  | 9.547                |
| A     | N       | 371    | 38.98         | 8      | 0.052                  | 9.03                 |
| A     | I       | 372    | 78.94         | 7      | 0.066                  | 8.805                |
| A     | R       | 373    | 105.1         | 7      | 0.007                  | 8.869                |
| A     | R       | 374    | 61.15         | 11     | 0.356                  | 8.775                |
| A     | V       | 375    | 22.29         | 12     | 0.134                  | 8.344                |
| A     | F       | 376    | 17.68         | 13     | 0.375                  | 8.29                 |
| A     | N       | 377    | 59.19         | 8      | 0.034                  | 8.591                |
| A     | D       | 378    | 18.13         | 11     | 0.147                  | 8.346                |
| A     | C       | 379    | 12.53         | 13     | 0.362                  | 8.005                |
| A     | R       | 380    | 63.29         | 12     | 0.326                  | 8.29                 |
| A     | D       | 381    | 23.79         | 11     | 0.087                  | 8.455                |
| A     | I       | 382    | 20.97         | 13     | 0.311                  | 8.15                 |
| A     | I       | 383    | 16.16         | 11     | 0.062                  | 8.352                |
| A     | Q       | 384    | 21.55         | 13     | 0.309                  | 8.367                |
| A     | R       | 385    | 27.43         | 13     | 0.637                  | 8.318                |
| A     | M       | 386    | 93.59         | 8      | 0.012                  | 8.627                |

| Chain | Residue | Number | Solvated area | Degree | Betweenness centrality | Closeness centrality |
|-------|---------|--------|---------------|--------|------------------------|----------------------|
| A     | H       | 387    | 28.69         | 12     | 0.337                  | 8.3                  |
| A     | L       | 388    | 13.26         | 13     | 0.178                  | 8.59                 |
| A     | R       | 389    | 79.13         | 11     | 0.406                  | 8.439                |
| A     | Q       | 390    | 81.48         | 6      | 0.005                  | 8.808                |
| A     | Y       | 391    | 40.77         | 7      | 0.328                  | 8.582                |
| A     | E       | 392    | 77.84         | 8      | 0.164                  | 8.888                |
| A     | L       | 393    | 26.49         | 10     | 0.166                  | 8.974                |
| A     | L       | 394    | 73.63         | 6      | 0.077                  | 8.803                |
