# Supplementary material
Source: PubMed Central journal article supplement (PMC5837000)
Supplement: NIHMS75372-supplement-Supplementary_Dataset_3.pdf [file NIHMS75372-supplement-Supplementary_Dataset_3.pdf]

# Report for 5C1M : Crystal Structure Of Active Mu-Opioid Receptor Bound To The Agonist Bu72 Chain A

List of all contacts can be downloaded here  
 (../structures\_database/5C1M/5C1M\_txt.zip)

Thu Aug 10 2017

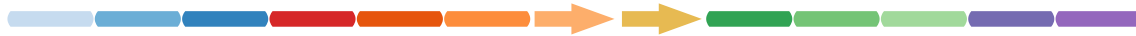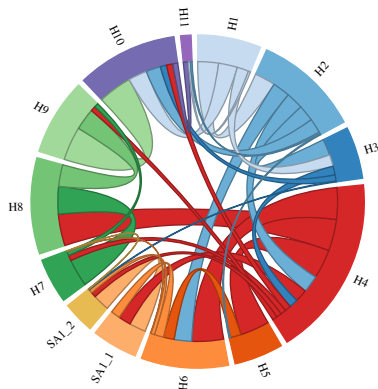

Figure 1: Chord plot showing secondary structure elements

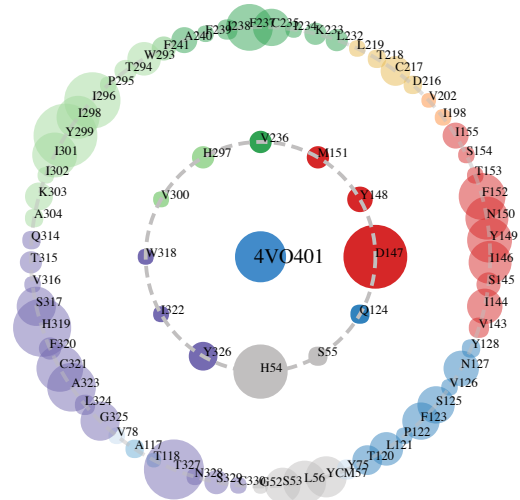

Figure 2: Asteroid Plot for selected residue 4VO401

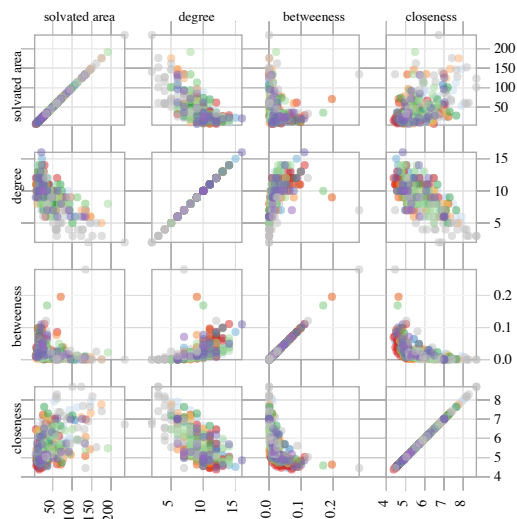

Figure 3: Network statistics

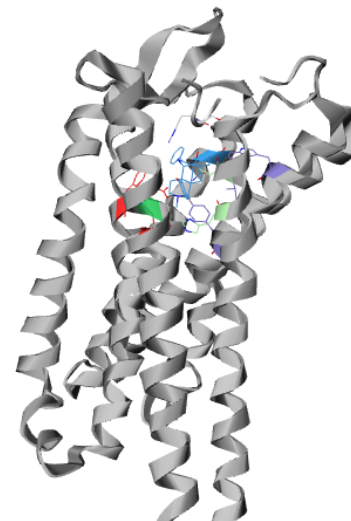

Figure 4: The 3D structure view of 5C1M A

| Name   | Solvated Area | Degree | Betweenness | Closeness |
|--------|---------------|--------|-------------|-----------|
| F347   | 234.87        | 2      | 0           | 6.726     |
| R277   | 191.55        | 8      | 0.022       | 5.49      |
| L265   | 176.07        | 3      | 0           | 7.414     |
| Y210   | 175.27        | 5      | 0.001       | 7.764     |
| OLC403 | 162.29        | 5      | 0.025       | 5.538     |
| Q212   | 152.09        | 3      | 0           | 8.183     |
| R211   | 148.08        | 6      | 0.008       | 7.317     |
| M65    | 147.51        | 5      | 0           | 7.914     |
| H223   | 146           | 5      | 0.001       | 7.643     |
| R182   | 145.9         | 6      | 0.001       | 5.431     |

Table 1: Top ten residues with highest solvated area

| Name | Solvated Area | Degree | Betweenness | Closeness |
|------|---------------|--------|-------------|-----------|
| G325 | 6.97          | 9      | 0.01        | 5.16      |
| C140 | 7.22          | 12     | 0.01        | 6.469     |
| A184 | 7.38          | 11     | 0.014       | 4.893     |
| G199 | 8.16          | 10     | 0.014       | 5.41      |
| S162 | 8.21          | 11     | 0.038       | 4.571     |
| A111 | 8.44          | 11     | 0.017       | 4.907     |
| A337 | 9.12          | 10     | 0.036       | 4.767     |
| A102 | 9.46          | 9      | 0.018       | 4.836     |
| S195 | 9.67          | 12     | 0.032       | 4.876     |
| A175 | 9.73          | 10     | 0.005       | 5.01      |

Table 2: Bottom ten residues with lowest solvated area

| Name | Solvated Area | Degree | Betweenness | Closeness |
|------|---------------|--------|-------------|-----------|
| Y326 | 21.24         | 16     | 0.11        | 4.855     |
| Y106 | 22.83         | 15     | 0.086       | 4.517     |
| I107 | 16.36         | 14     | 0.052       | 4.607     |
| F289 | 18.81         | 14     | 0.058       | 4.712     |
| W318 | 23.11         | 14     | 0.049       | 5.693     |
| H297 | 15.26         | 14     | 0.067       | 4.888     |
| Y299 | 14.96         | 14     | 0.028       | 5.576     |
| M255 | 21.29         | 14     | 0.038       | 4.986     |
| Y148 | 29.21         | 14     | 0.111       | 5.033     |
| I93  | 10.27         | 14     | 0.037       | 5.102     |

Table 3: Top ten residues with highest degree values

| Name   | Solvated Area | Degree | Betweenness | Closeness |
|--------|---------------|--------|-------------|-----------|
| F347   | 234.87        | 2      | 0           | 6.726     |
| T307   | 141.1         | 2      | 0           | 6.895     |
| P63    | 101.17        | 3      | 0           | 8.686     |
| PO4405 | 61.19         | 3      | 0           | 8.29      |
| L265   | 176.07        | 3      | 0           | 7.414     |
| S62    | 123.39        | 3      | 0           | 8.686     |
| Q212   | 152.09        | 3      | 0           | 8.183     |
| T60    | 127.77        | 4      | 0.001       | 7.695     |
| G61    | 61.14         | 4      | 0.008       | 8.067     |
| C346   | 60.13         | 4      | 0.003       | 6.114     |

Table 4: Bottom ten residues with lowest degree values

| Name   | Solvated Area | Degree | Betweenness | Closeness |
|--------|---------------|--------|-------------|-----------|
| P6G406 | 134.51        | 7      | 0.281       | 4.455     |
| D177   | 70.89         | 9      | 0.196       | 4.636     |
| M243   | 35.8          | 10     | 0.169       | 4.588     |
| 4VO401 | 33.2          | 12     | 0.121       | 5.036     |
| Y148   | 29.21         | 14     | 0.111       | 5.033     |
| Y326   | 21.24         | 16     | 0.11        | 4.855     |
| N328   | 19.45         | 13     | 0.1         | 4.619     |
| L176   | 14.04         | 13     | 0.099       | 4.843     |
| F241   | 13.49         | 13     | 0.098       | 4.743     |
| A168   | 12.1          | 11     | 0.097       | 4.76      |

Table 5: Top ten residues with highest betweenness values

| Name   | Solvated Area | Degree | Betweenness | Closeness |
|--------|---------------|--------|-------------|-----------|
| F347   | 234.87        | 2      | 0           | 6.726     |
| G213   | 58.44         | 4      | 0           | 8.181     |
| PO4405 | 61.19         | 3      | 0           | 8.29      |
| T311   | 61.98         | 6      | 0           | 7.031     |
| Q212   | 152.09        | 3      | 0           | 8.183     |
| S266   | 64.82         | 5      | 0           | 7.369     |
| M65    | 147.51        | 5      | 0           | 7.914     |
| P309   | 91.62         | 4      | 0           | 7.086     |
| S62    | 123.39        | 3      | 0           | 8.686     |
| T307   | 141.1         | 2      | 0           | 6.895     |

Table 6: Bottom ten residues with lowest betweenness values

| Name   | Solvated Area | Degree | Betweenness | Closeness |
|--------|---------------|--------|-------------|-----------|
| S62    | 123.39        | 3      | 0           | 8.686     |
| P63    | 101.17        | 3      | 0           | 8.686     |
| PO4405 | 61.19         | 3      | 0           | 8.29      |
| Q212   | 152.09        | 3      | 0           | 8.183     |
| G213   | 58.44         | 4      | 0           | 8.181     |
| G61    | 61.14         | 4      | 0.008       | 8.067     |
| S64    | 54.04         | 6      | 0.011       | 7.919     |
| M65    | 147.51        | 5      | 0           | 7.914     |
| Y210   | 175.27        | 5      | 0.001       | 7.764     |
| T60    | 127.77        | 4      | 0.001       | 7.695     |

Table 7: Top ten residues with highest closeness values

| Name   | Solvated Area | Degree | Betweenness | Closeness |
|--------|---------------|--------|-------------|-----------|
| T160   | 15.66         | 12     | 0.07        | 4.381     |
| P6G406 | 134.51        | 7      | 0.281       | 4.455     |
| L158   | 15.74         | 11     | 0.073       | 4.455     |
| M161   | 23.05         | 11     | 0.038       | 4.471     |
| L110   | 13.59         | 12     | 0.057       | 4.471     |
| N332   | 17.5          | 12     | 0.086       | 4.514     |
| F178   | 23.35         | 11     | 0.093       | 4.514     |
| Y106   | 22.83         | 15     | 0.086       | 4.517     |
| T157   | 15.44         | 11     | 0.026       | 4.533     |
| Y336   | 36.23         | 10     | 0.077       | 4.552     |

Table 8: Bottom ten residues with lowest closeness values

| Ligand | Residue/Ligand | Number of contacts |
|--------|----------------|--------------------|
| YCM57  | P58            | 19                 |
| 4VO401 | D147           | 16                 |
| YCM57  | L56            | 13                 |
| 4VO401 | H54            | 13                 |
| YCM57  | W318           | 11                 |
| YCM57  | Q59            | 10                 |
| PO4405 | T225           | 9                  |
| P6G406 | F178           | 8                  |
| OLC403 | OLC402         | 7                  |
| OLC402 | OLC403         | 7                  |

Table 9: Top ten residues with highest number of atomic contacts with a ligand

| Ligand | Residue/Ligand | Number of contacts |
|--------|----------------|--------------------|
| P6G406 | D177           | 1                  |
| YCM57  | S53            | 1                  |
| P6G407 | F87            | 1                  |
| 4VO401 | V300           | 1                  |
| P6G407 | L83            | 1                  |
| P6G407 | V80            | 1                  |
| 4VO401 | W318           | 1                  |
| P6G406 | L194           | 1                  |
| 4VO401 | I322           | 1                  |
| CLR404 | C321           | 1                  |

Table 10: Bottom ten residues with lowest number of atomic contacts with a ligand
